# Supplementary material for: In situ generated 3D hierarchical Co3O4@MnO2 core–shell hybrid materials: self-assembled fabrication, morphological control and energy applications
Source: Royal Society of Chemistry journal article supplement (doi:10.1039/c8ta11487k), 2019-01-01
Supplement: c8ta11487k1.pdf [file c8ta11487k1.pdf]

## Supporting Information

### In-situ Generated 3D Hierarchical $\text{Co}_3\text{O}_4@\text{MnO}_2$ Core-Shell Hybrid Materials: Self-assembled Fabrication, Morphological Control and Energy Applications

Qingqing Miao<sup>a</sup>, Yanyan Du<sup>ab</sup>, Gongtang Wang<sup>b</sup>, Zhicheng Sun<sup>c</sup>, Yuehan Zhao<sup>c</sup> and Suojiang Zhang<sup>\*a</sup>

<sup>a</sup> Assoc. Prof. Q. Miao, Prof. S. Zhang

Beijing Key Laboratory of Ionic Liquids Clean Process, CAS Key Laboratory of Green Process and Engineering, State Key Laboratory of Multiphase Complex System, Institute of Process Engineering, Chinese Academy of Sciences, No. 1 Zhongguancun North Second Street, Haidian District, Beijing 100190, P.R. China.

E-mail: [sjzhang@ipe.ac.cn](mailto:sjzhang@ipe.ac.cn)

<sup>b</sup> Y. Du, Prof. G. Wang

School of Physics and Electronics, Shandong Normal University, Jinan 250358, P.R. China.

<sup>c</sup> Assoc. Prof. Z. Sun, Y. Zhao

Beijing Engineering Research Center of Printed Electronics, Beijing Institute of Graphic Communication, Beijing 102600, P.R. China.

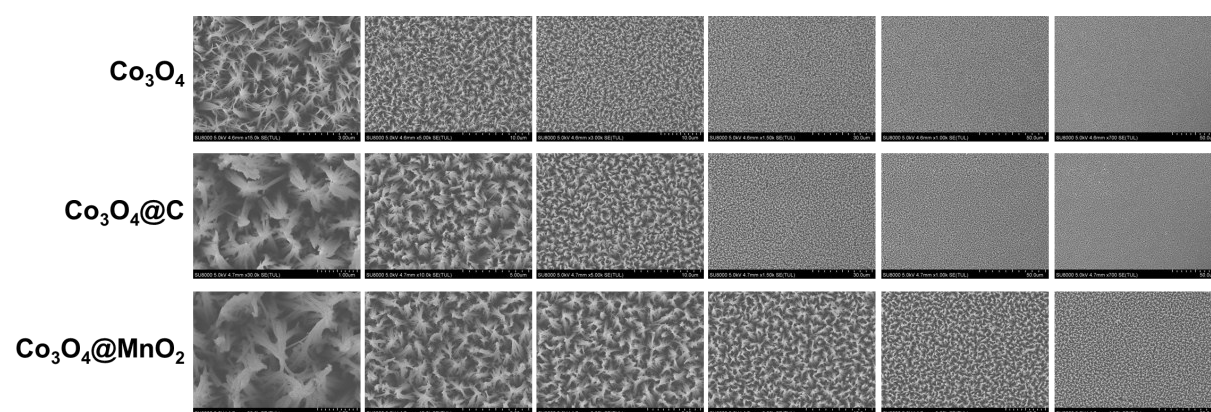

**Figure S1.** SEM images of the large-scale in-situ 3D hierarchical  $\text{Co}_3\text{O}_4$ ,  $\text{Co}_3\text{O}_4@\text{C}$  and  $\text{Co}_3\text{O}_4@\text{MnO}_2$  nanoarrays grown on the oblique downward FTO glasses at different magnifications.

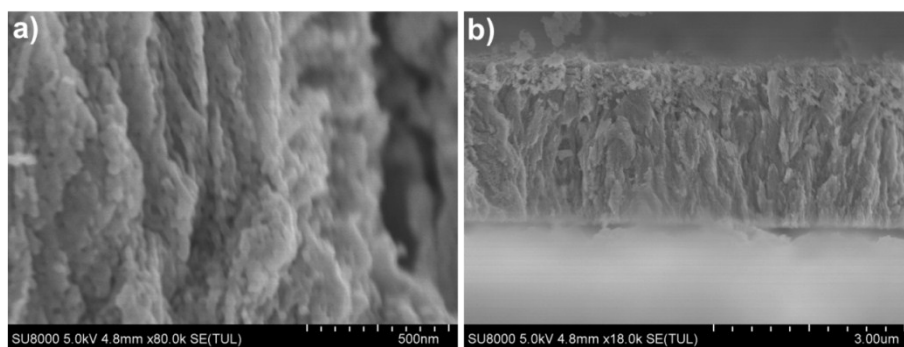

**Figure S2.** Cross section SEM images of the in-situ 3D hierarchical  $\text{Co}_3\text{O}_4$  materials grown on the oblique downward FTO glasses at different magnifications.

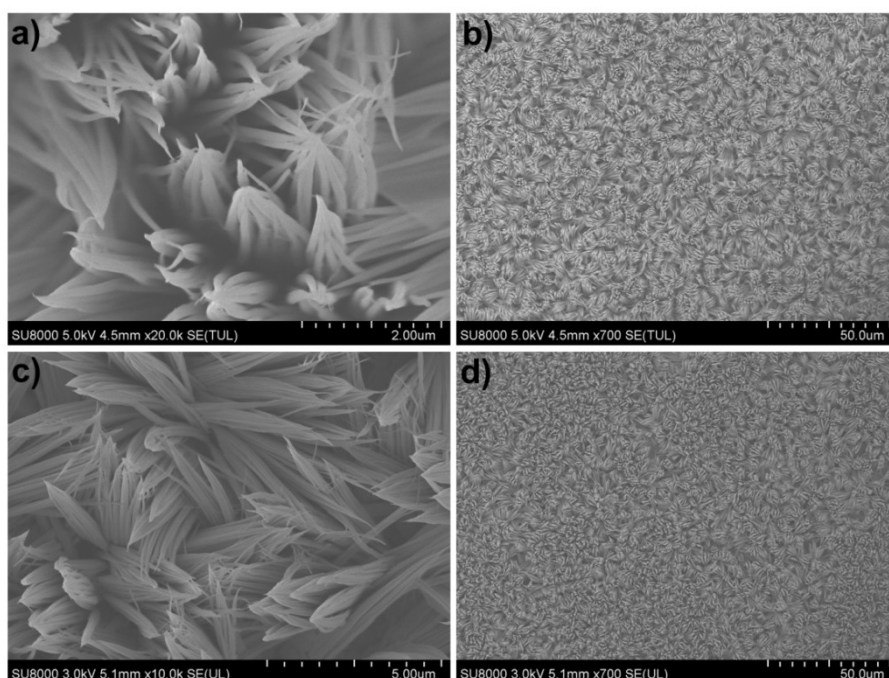

**Figure S3.** SEM images at different magnifications of the in-situ 3D hierarchical  $\text{Co}_3\text{O}_4$  nanoarrays on FTO glasses with different orientations. a-b) grown on the oblique upward FTO glass; c-d) grown on the horizontal downward FTO glass.

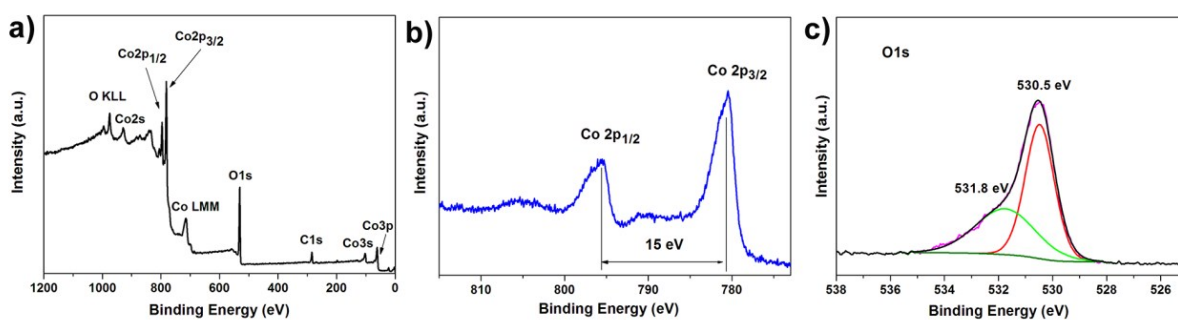

**Figure S4.** a) XPS spectra of the as-synthesized  $\text{Co}_3\text{O}_4$  nanoarrays. b-c) XPS survey scan of Co 2p and O 1s, respectively.

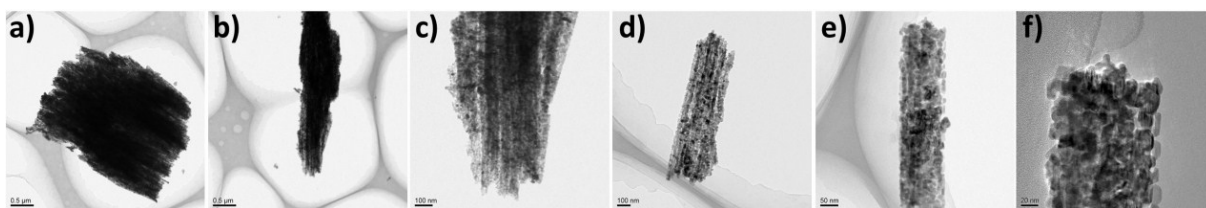

**Figure S5.** TEM images of the in-situ 3D hierarchical  $\text{Co}_3\text{O}_4$  nanoarrays at different magnifications.

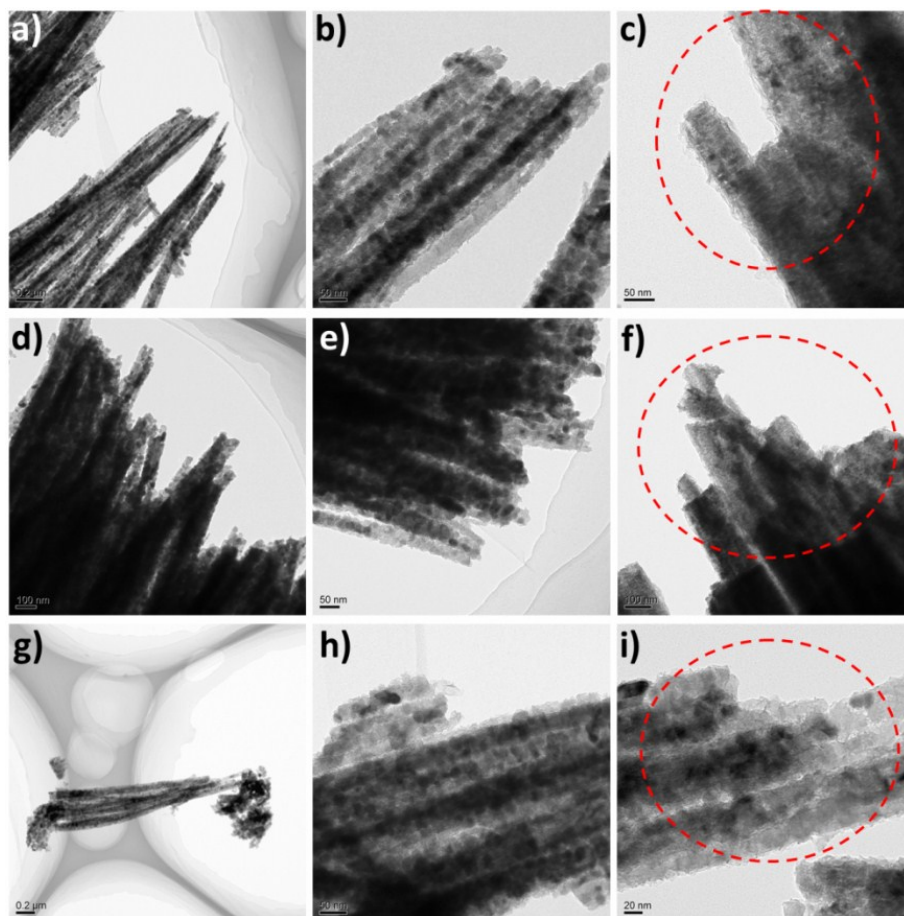

**Figure S6.** TEM images of the in-situ 3D hierarchical  $\text{Co}_3\text{O}_4@\text{MnO}_2$  core-shell hybrid nanoarrays at different magnifications.

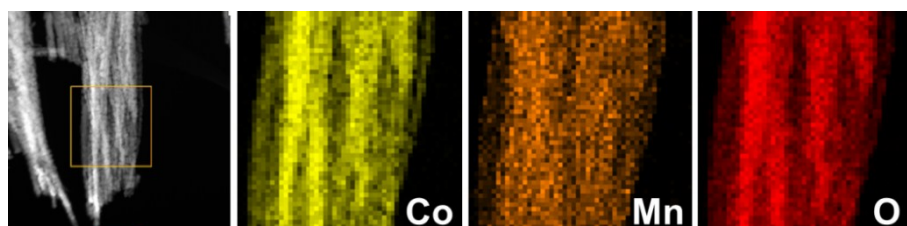

**Figure S7.** EDS mapping of the in-situ 3D hierarchical  $\text{Co}_3\text{O}_4@\text{MnO}_2$  core-shell hybrid nanoarrays.



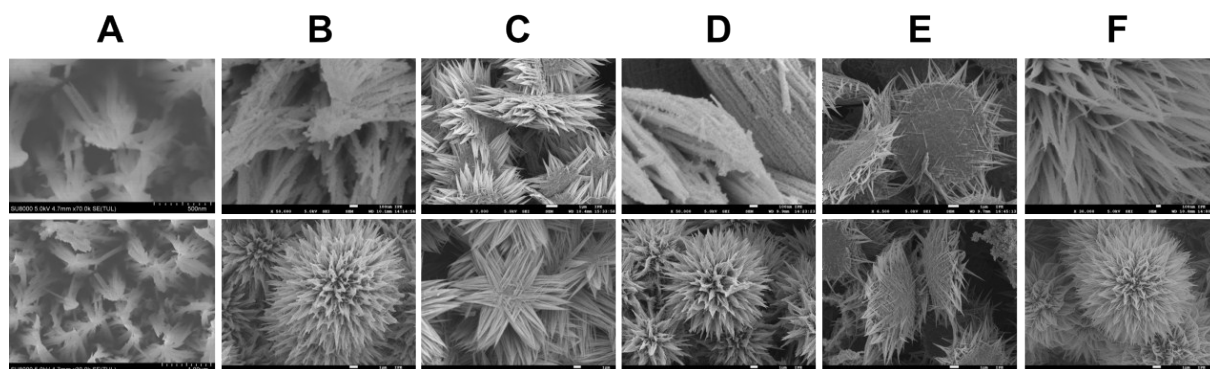

**Figure S8.** SEM images of the in-situ 3D hierarchical  $\text{Co}_3\text{O}_4@\text{C}$  A-F materials with different morphologies.

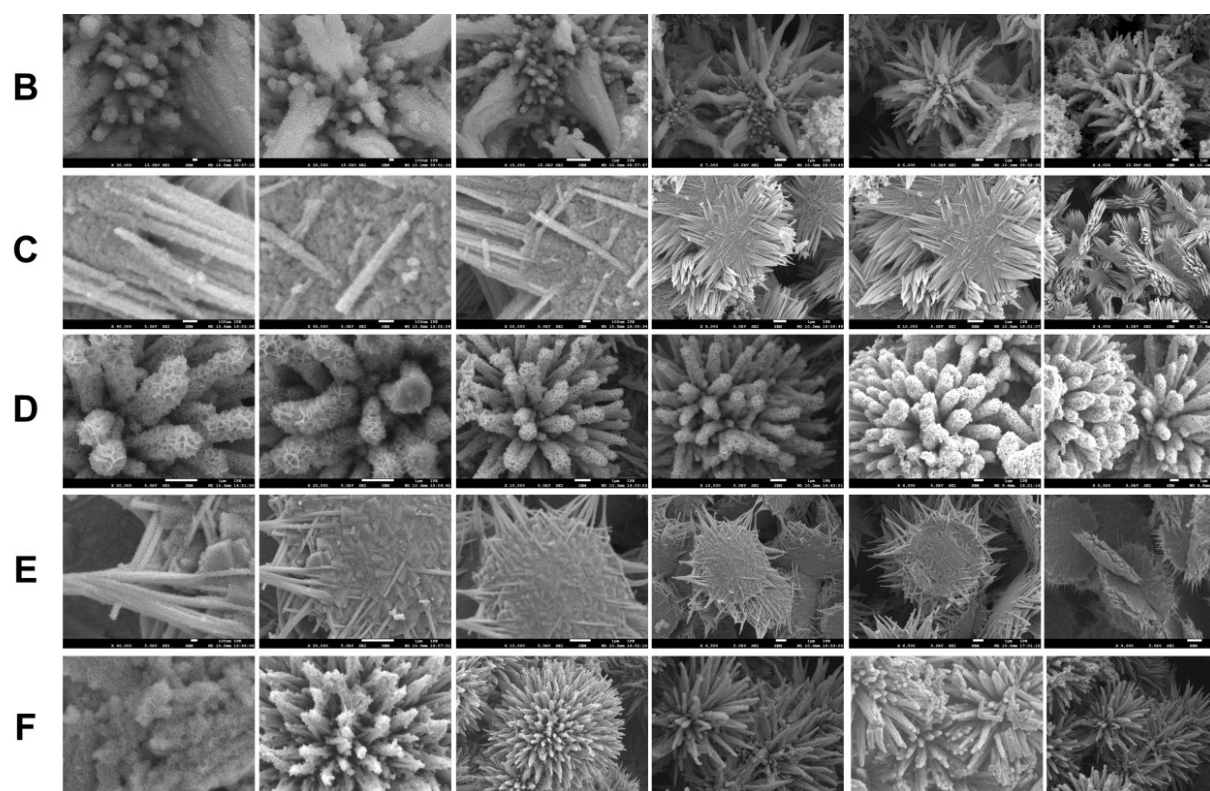

**Figure S9.** SEM images of the in-situ 3D hierarchical  $\text{Co}_3\text{O}_4@\text{MnO}_2$  core-shell hybrid A-F materials with different morphologies.

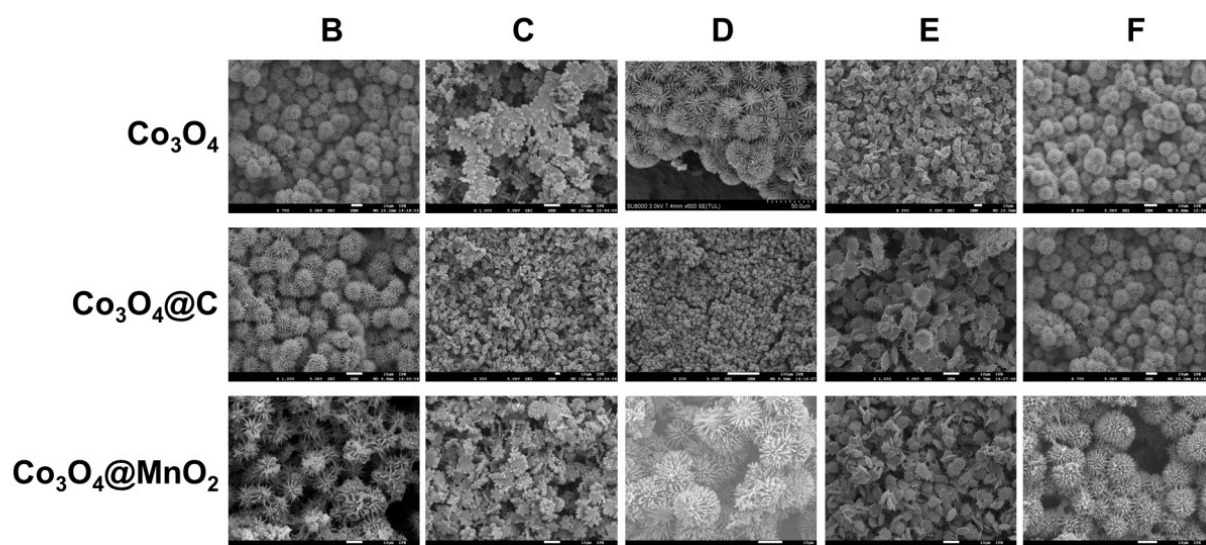

**Figure S10.** SEM images of the large-scale in-situ 3D hierarchical  $\text{Co}_3\text{O}_4$ ,  $\text{Co}_3\text{O}_4@\text{C}$  and  $\text{Co}_3\text{O}_4@\text{MnO}_2$  B-F materials.

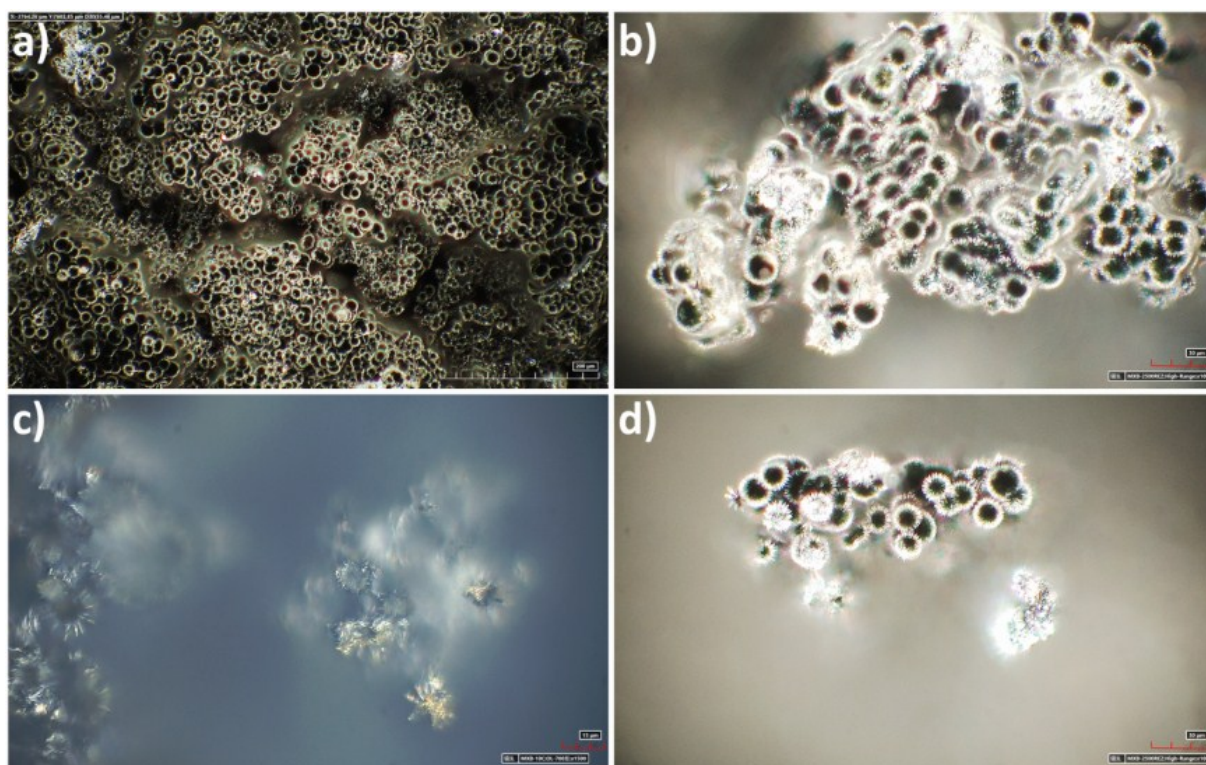

**Figure S11.** 3D Digital Microscope images of the in-situ synthesized 3D hierarchical a)  $\text{Co}_3\text{O}_4$  B and b-d)  $\text{Co}_3\text{O}_4@\text{MnO}_2$  B.

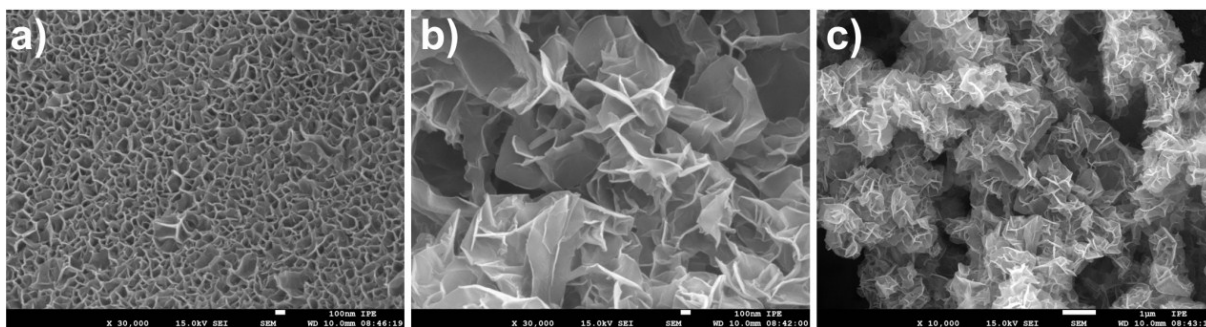

**Figure S12.** SEM images of the in-situ ultrathin 3D hierarchical a) MnO<sub>2</sub> layer and b-c) the corresponding 3D hierarchical MnO<sub>2</sub> nanoparticles in the in-situ process.

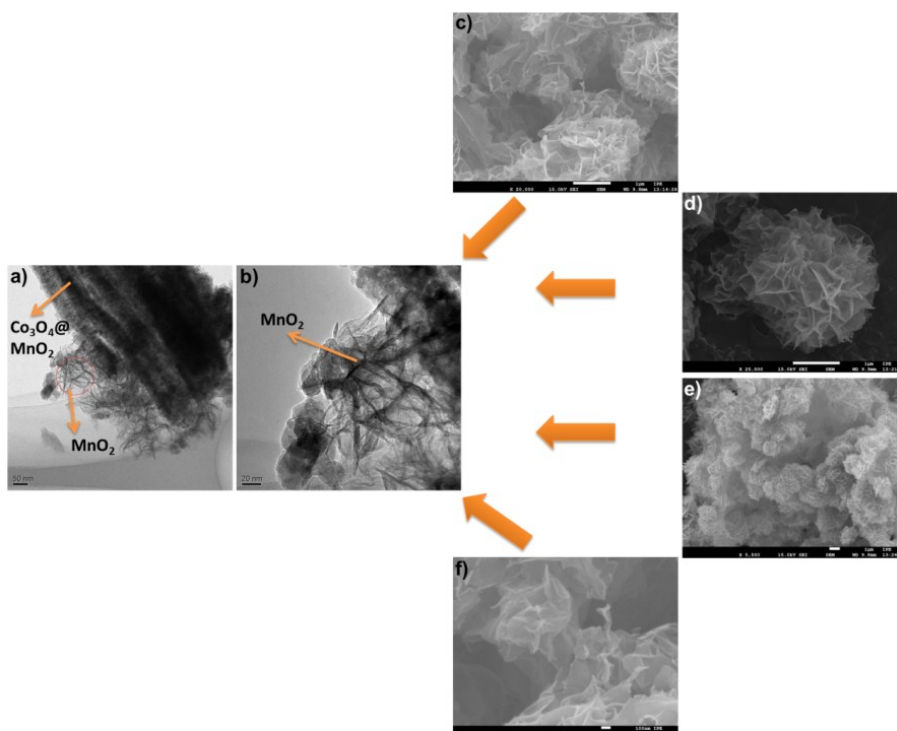

**Figure S13.** a-b) HRTEM of the MnO<sub>2</sub> layer in the Co<sub>3</sub>O<sub>4</sub>@MnO<sub>2</sub> hybrid architecture. c-f) HRSEM images of the MnO<sub>2</sub> nanoparticles.

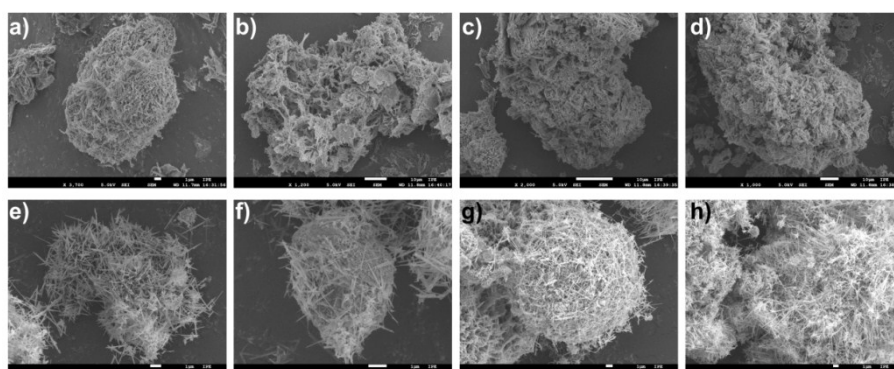

**Figure S14.** SEM images of a-d) the obtained Co<sub>3</sub>O<sub>4</sub> materials and e-f) Co<sub>3</sub>O<sub>4</sub>@MnO<sub>2</sub> materials synthesized by the traditional method without any substrate.



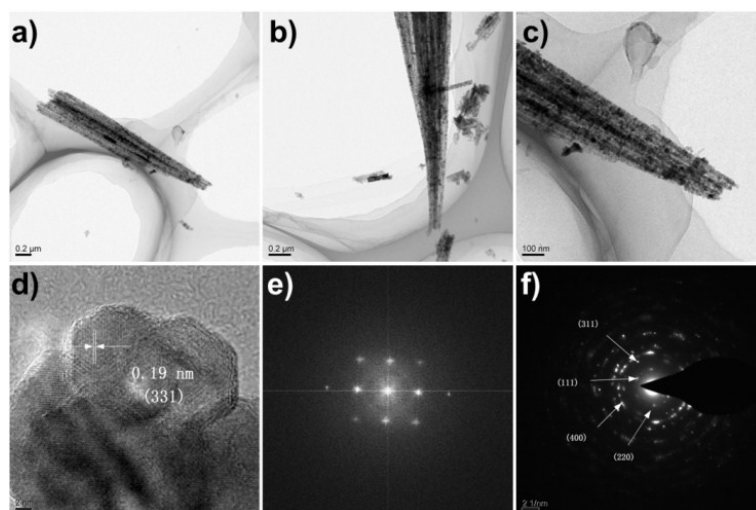

**Figure S15.** TEM images of the in-situ 3D hierarchical  $\text{Co}_3\text{O}_4$  material C.

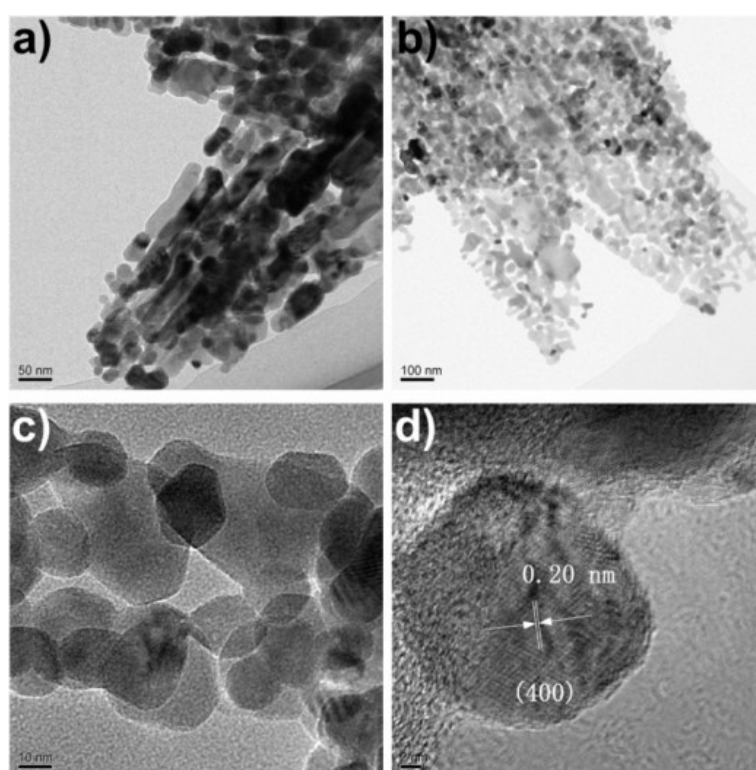

**Figure S16.** TEM images of the in-situ 3D hierarchical  $\text{Co}_3\text{O}_4$  material D.

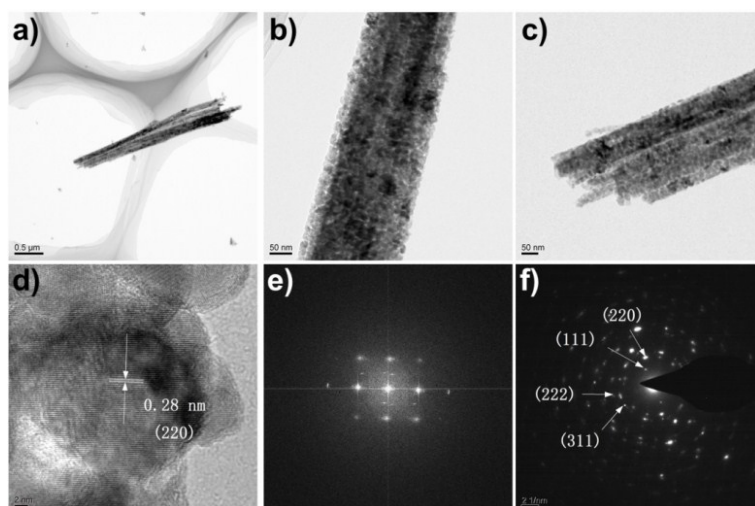

**Figure S17.** TEM images of the in-situ 3D hierarchical  $\text{Co}_3\text{O}_4$  material E.

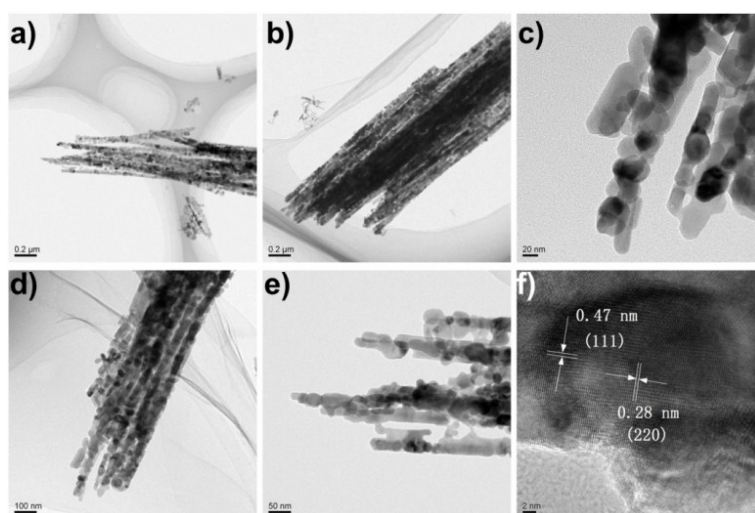

**Figure S18.** TEM images of the in-situ 3D hierarchical  $\text{Co}_3\text{O}_4$  material F.

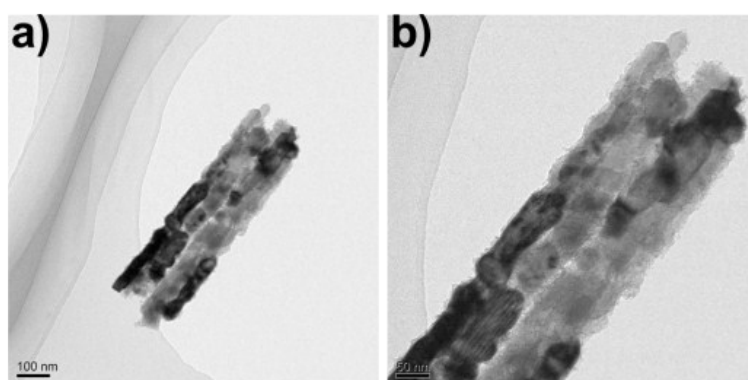

**Figure S19.** TEM images of the in-situ 3D hierarchical  $\text{Co}_3\text{O}_4@\text{MnO}_2$  hybrid material D.



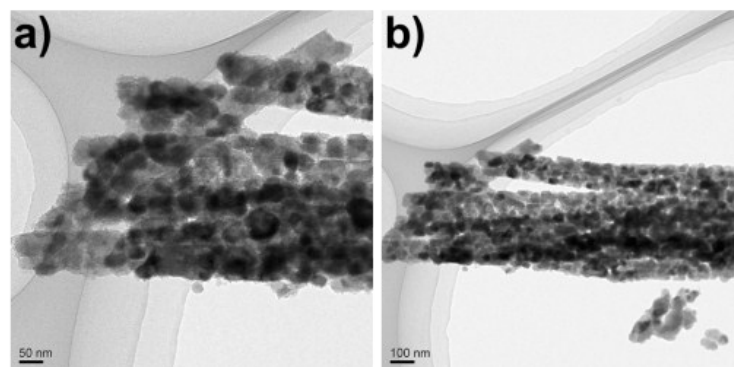

**Figure S20.** TEM images of the in-situ 3D hierarchical  $\text{Co}_3\text{O}_4@\text{MnO}_2$  hybrid material F.

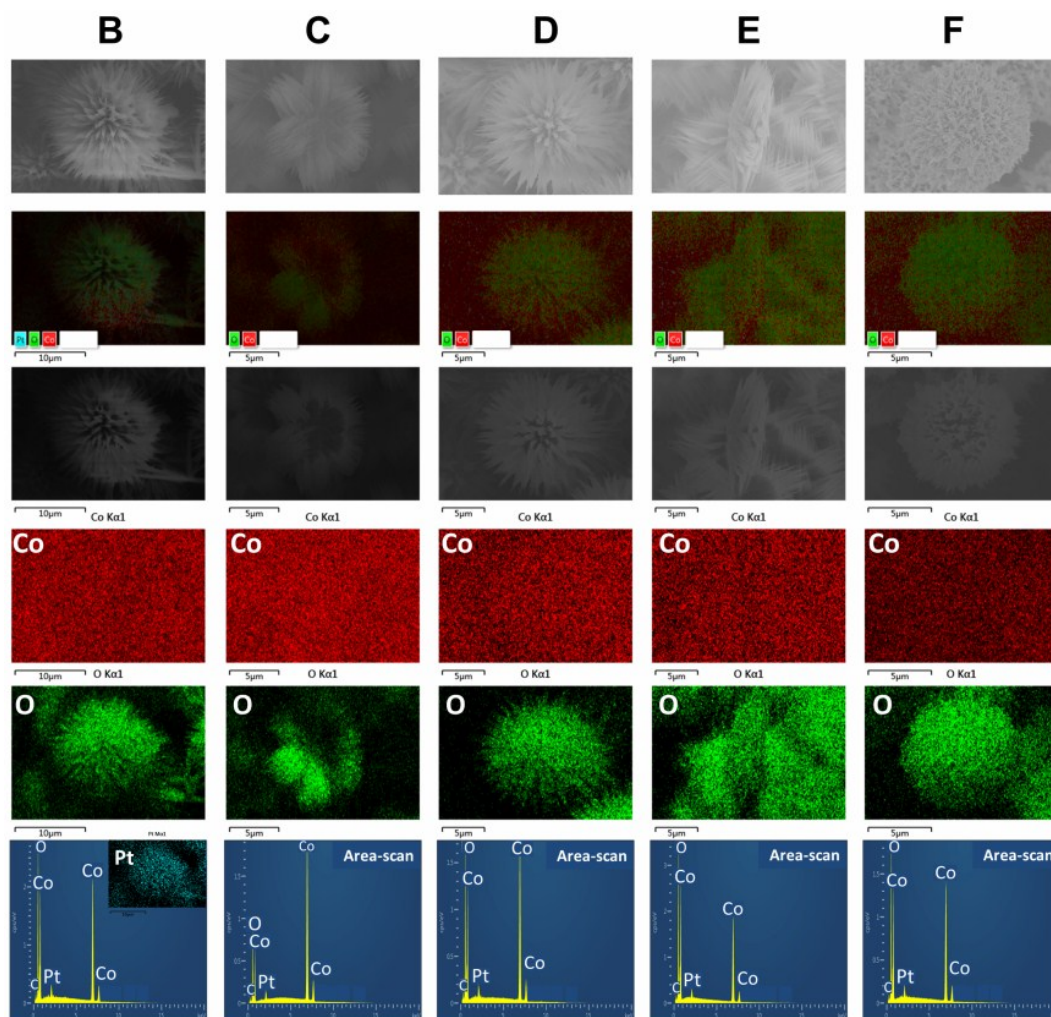

**Figure S21.** EDS mapping and Area-scan EDS spectra from a whole single  $\text{Co}_3\text{O}_4@\text{C}$  3D hierarchical structure B-F.

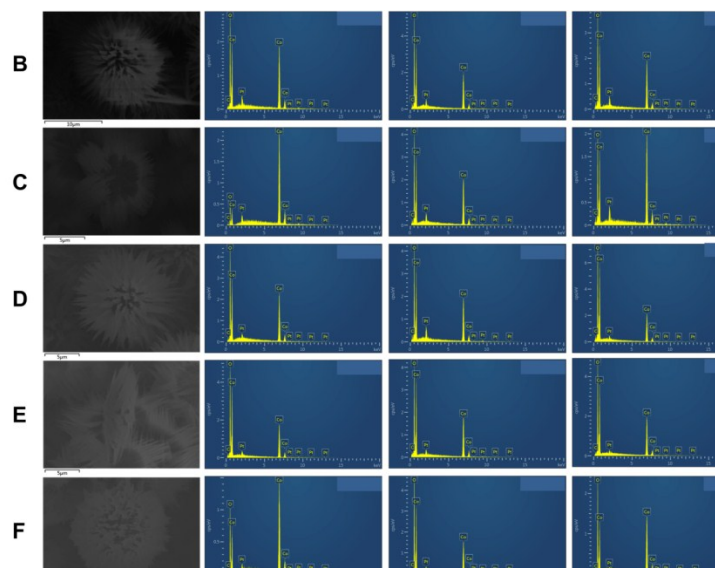

**Figure S22.** EDS spectra by the spot-scan method from a whole single 3D hierarchical  $\text{Co}_3\text{O}_4@\text{C}$  structure (B-F).

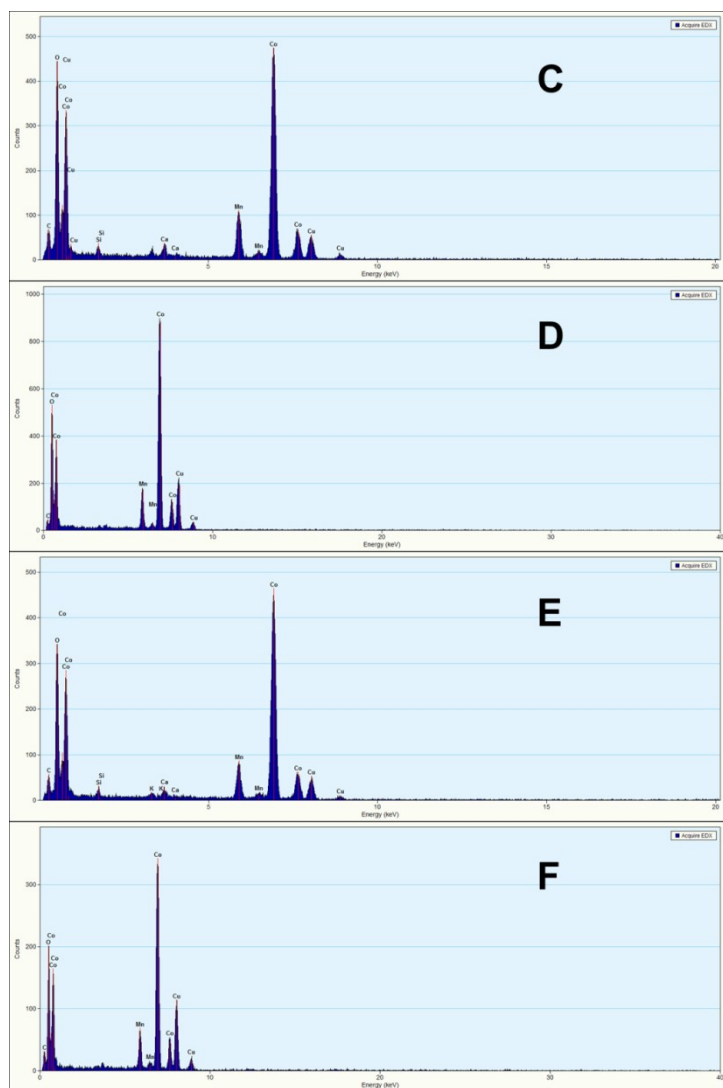

**Figure S23.** EDS spectra by the spot-scan method from a whole single 3D hierarchical  $\text{Co}_3\text{O}_4@\text{MnO}_2$  structure (C-F).

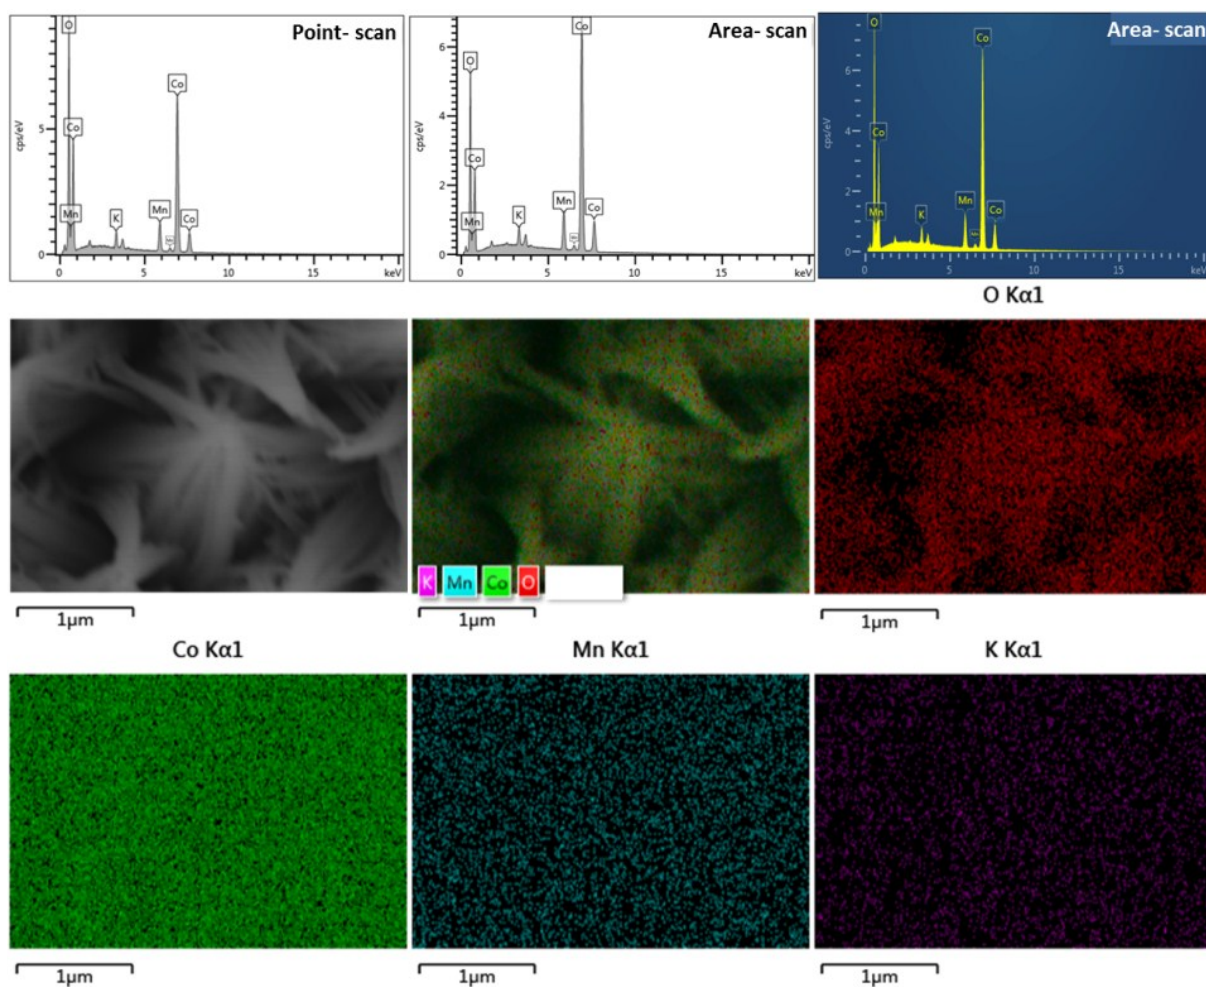

**Figure S24.** EDS mapping and EDS spectra by both the area-scan and spot-scan methods from a whole single 3D hierarchical  $\text{Co}_3\text{O}_4@\text{MnO}_2$  structure (A).

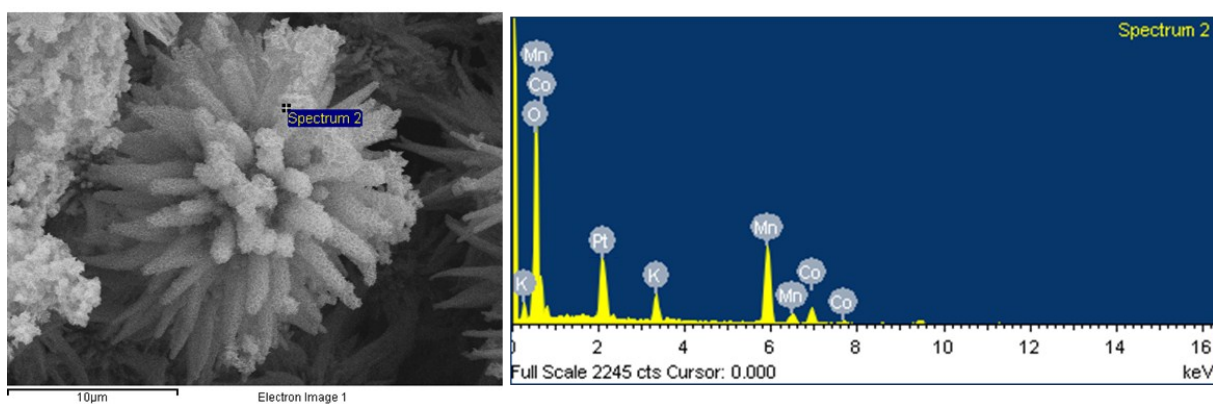

**Figure S25.** EDS spectra by the spot-scan method from a whole single 3D hierarchical  $\text{Co}_3\text{O}_4@\text{MnO}_2$  structure (B).



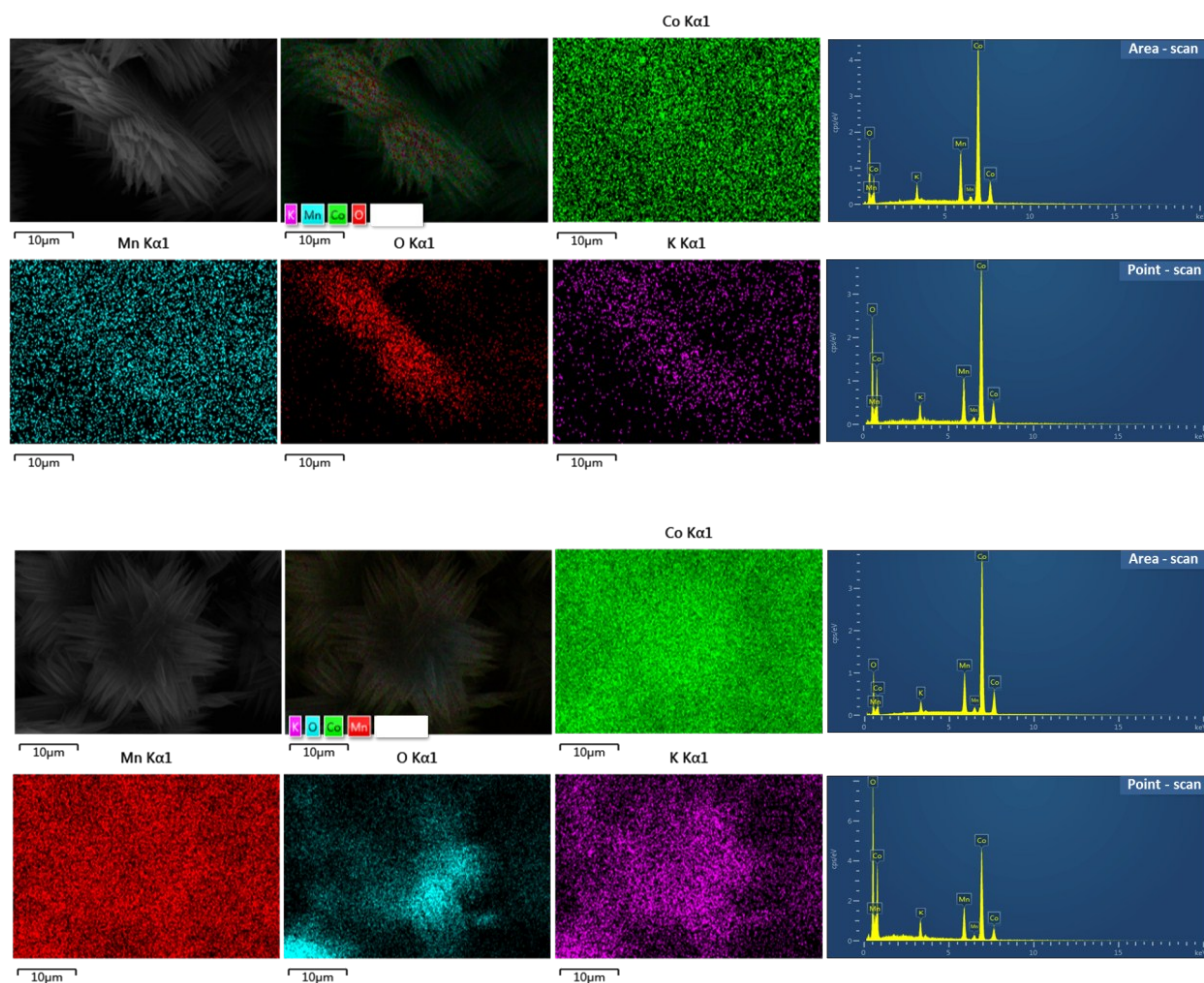

**Figure S26.** EDS mapping and EDS spectra by both the area-scan and spot-scan methods from a whole single 3D hierarchical  $\text{Co}_3\text{O}_4@\text{MnO}_2$  structure (C).

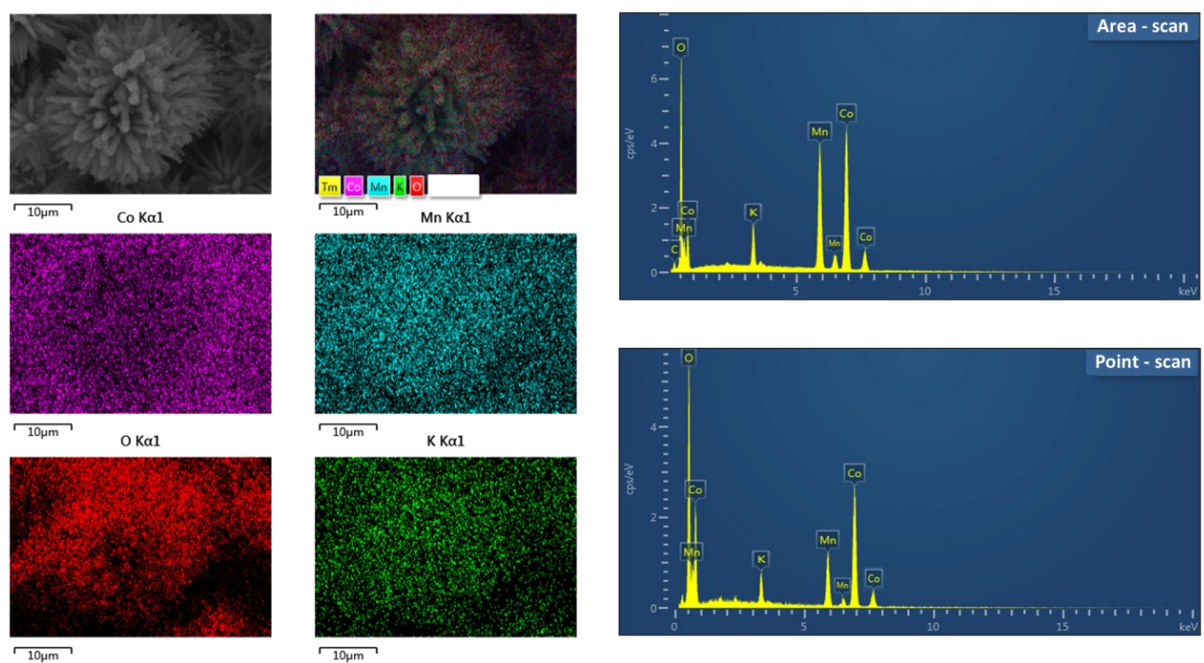

**Figure S27.** EDS mapping and EDS spectra by both the area-scan and spot-scan methods from a whole single 3D hierarchical  $\text{Co}_3\text{O}_4@\text{MnO}_2$  structure (D).

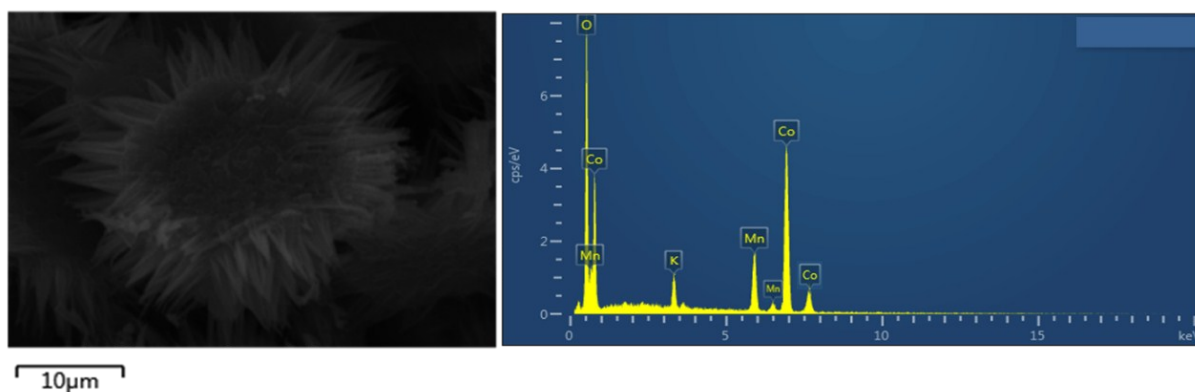

**Figure S28.** EDS spectra by the spot-scan method from a whole single 3D hierarchical  $\text{Co}_3\text{O}_4@\text{MnO}_2$  structure (E).

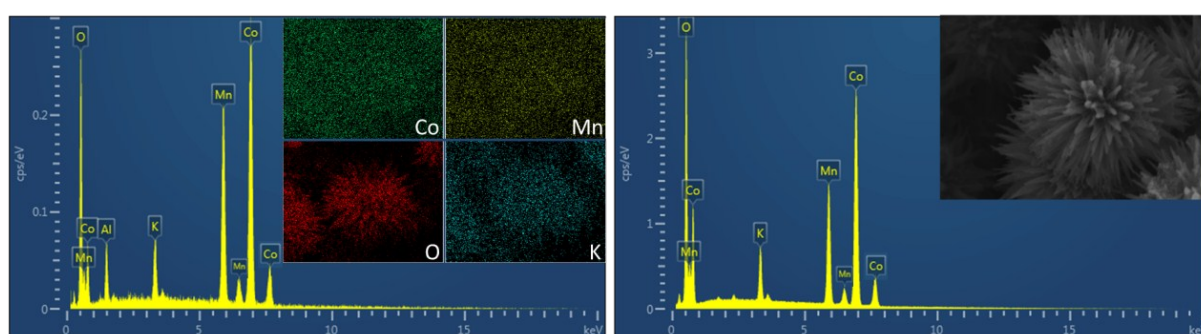

**Figure S29.** EDS mapping and EDS spectra by both the area-scan and spot-scan methods from a whole single 3D hierarchical  $\text{Co}_3\text{O}_4@\text{MnO}_2$  structure (F).

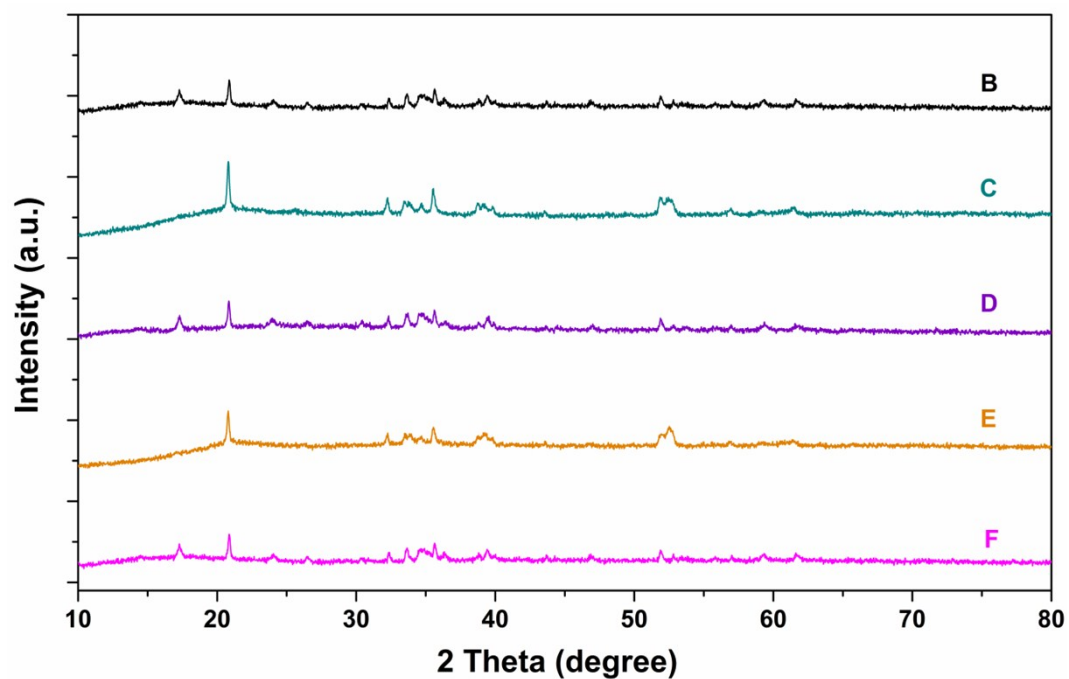

**Figure S30.** XRD patterns of the  $\text{Co}(\text{OH})\text{F}$  precursors for the in-situ synthesized 3D hierarchical  $\text{Co}_3\text{O}_4$  B-F materials.

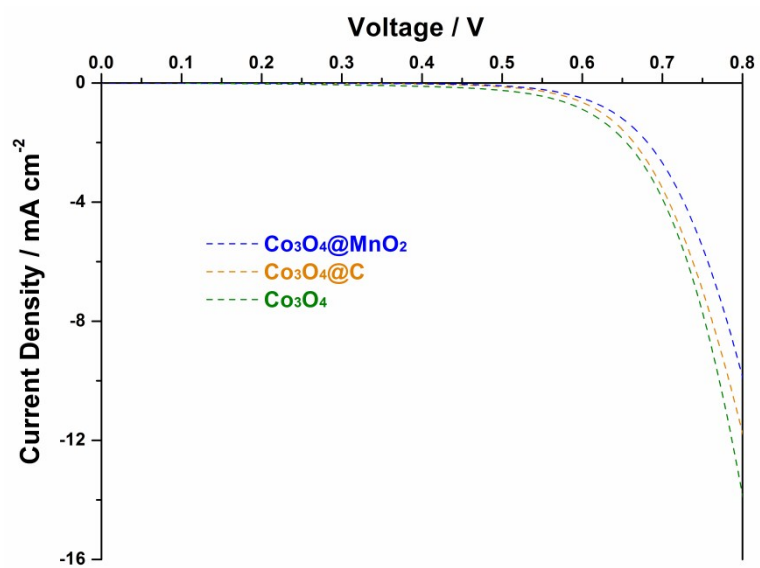

**Figure S31.** Dark I-V curves of the DSSCs based on Co<sub>3</sub>O<sub>4</sub>, Co<sub>3</sub>O<sub>4</sub>@C and Co<sub>3</sub>O<sub>4</sub>@MnO<sub>2</sub> counter electrodes.
